# Supplementary material for: Cooperative STAT/NF-κB signaling regulates lymphoma metabolic reprogramming and aberrant GOT2 expression
Source: PubMed Central journal article supplement (PMC5904148; doi:10.1038/s41467-018-03803-x), 2018-04-17
Supplement: 41467_2018_3803_MOESM3_ESM.pdf [file 41467_2018_3803_MOESM3_ESM.pdf]

## Description of Additional Supplementary Files

**File Name: Supplementary Data 1**

**Description:** Changes in protein abundance as determined by targeted proteomics (SWATH sequential window acquisition of all theoretical fragment ion spectra).
